# Supplementary material for: Polypyrrole-coated needle as an electrospray emitter for ambient mass spectrometry
Source: Royal Society of Chemistry journal article supplement (doi:10.1039/d0ay00652a), 2020-01-01
Supplement: d0ay00652a1.pdf [file d0ay00652a1.pdf]

## Supplementary Information

### Polypyrrole-coated needle as an electrospray emitter for ambient mass spectrometry

Giovanna L. de Araújo, Deborah V. A. de Aguiar, Igor Pereira, Lidya C. da Silva, Andréa R. Chaves, Boniek G. Vaz\*

Chemistry Institute, Federal University of Goiás, Goiânia, Goiás, 74690-900, Brazil

\*Corresponding author: boniek@ufg.br

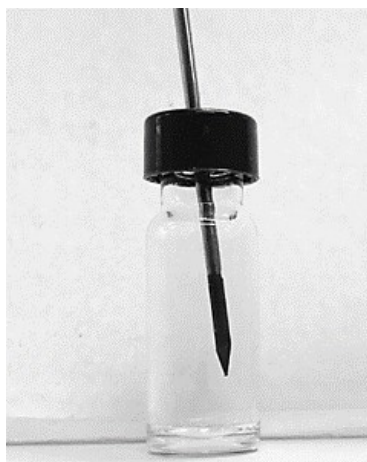

**Fig. S1** PPy-coated needle (black coating onto the tip) inserted into a synthetic urine sample for the extraction of the analyte.

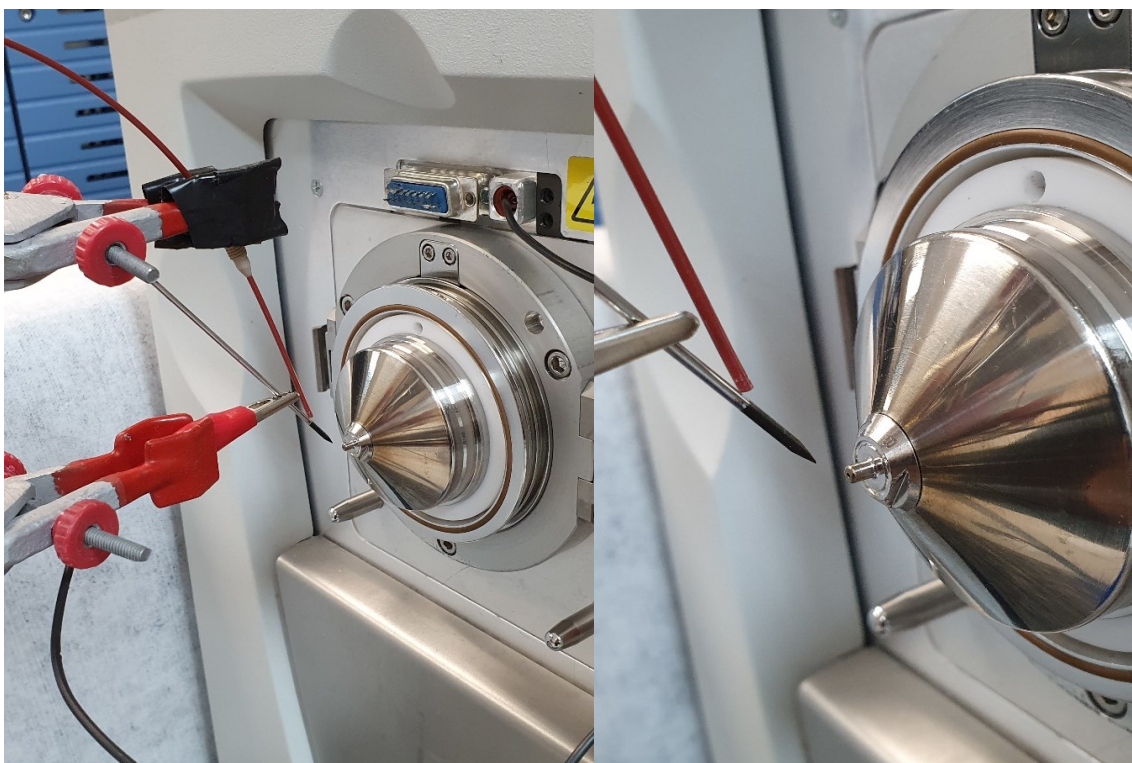

**Fig. S2** Photos of the PPy-ESI-MS system.

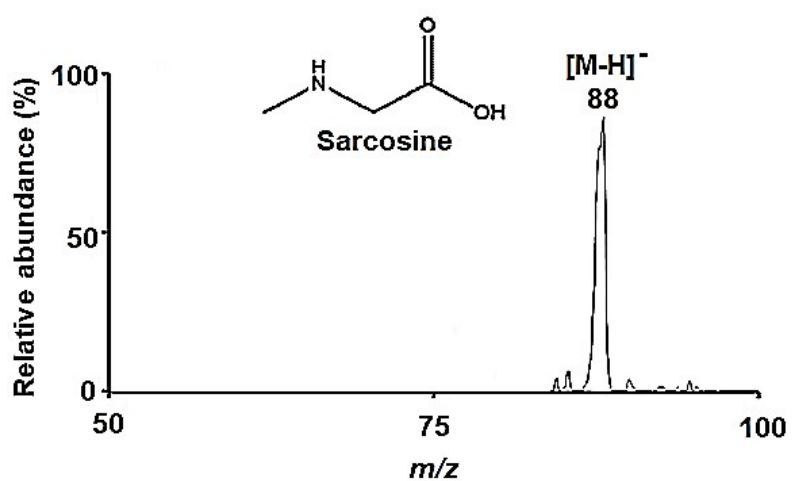

**Fig. S3** Negative ion mode mass spectrum of sarcosine  $[M-H]^-$  in synthetic urine obtained using the PPy-ESI-MS method.

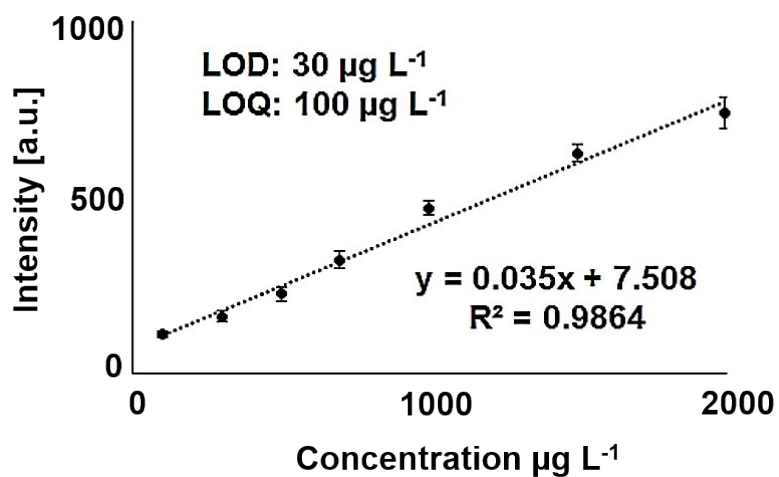

**Fig. S4** Calibration curve of sarcosine at concentrations ranging from 100 to 2000 µg L<sup>-1</sup> obtained by PPy-ESI-MS analysis.

**Table S1** Values of precision, accuracy, and recovery obtained from the analysis of sarcosine in synthetic urine by PPy-ESI-MS

| Analyte   | Concentration (µg L <sup>-1</sup> ) | Intraday (n = 5)                |                              | Interday (n = 3)                |                              | Recovery (%) |
|-----------|-------------------------------------|---------------------------------|------------------------------|---------------------------------|------------------------------|--------------|
|           |                                     | Precision (RSD <sup>a</sup> /%) | Accuracy (E <sup>b</sup> /%) | Precision (RSD <sup>a</sup> /%) | Accuracy (E <sup>b</sup> /%) |              |
| Sarcosine | 200                                 | 4.2                             | -7.5                         | 4.8                             | -6.8                         | 92.4         |
|           | 800                                 | 3.6                             | -3.8                         | 3.2                             | 1.5                          | 96.1         |
|           | 1700                                | 4.9                             | 2.6                          | 4.9                             | 3.4                          | 102.6        |

<sup>a</sup>Relative standard deviation.

<sup>b</sup>Relative error.
